# Supplementary material for: A Novel Framework for Phenotyping Children With Suspected or Confirmed Infection for Future Biomarker Studies
Source: Front Pediatr. 2021 Jul 28;9:688272. doi: 10.3389/fped.2021.688272 (PMC8356564; doi:10.3389/fped.2021.688272)
Supplement: Supplementary file 3 [file Data_Sheet_1.docx]

*The PERFORM consortium (*<https://www.perform2020.org/>) *is composed by:*

**PARTNER: Imperial College, London, UK**

Imperial College: Faculty of Medicine

Michael Levin1 (grant application, PERFORM Coordinator, CI)

Aubrey Cunnington1 (grant application, clinical translation), Tisham De1 (work package lead), Jethro A Herberg1 (grant application, PI), Myrsini Kaforou1 (grant application, bioinformatics), Victoria J Wright1 (grant application, scientific coordination)

Imperial College: consortium members1 (in alphabetical order)

Lucas Baumard, Lachlan Coin, Giselle D’Souza, Rachel Galassini, Dominic Habgood-Coote, Shea Hamilton, Clive Hoggart, Sara Hourmat, Heather Jackson, Naomi Lin, Ian Maconochie4, Stephanie Menikou, Samuel Nichols, Ruud Nijman, Ivonne Pena Paz, Priyen Shah, Clare Wilson, Ching-Fen Shen

Imperial College: Faculty of Engineering2

Molly Stevens (co-investigator), Eunjung Kim, Nayoung Kim, Benjamin Pierce

Imperial College Healthcare NHS Trust3: clinical recruitment (alphabetical order)

Ladan Ali, Sarah Darnell, Rikke Jorgensen, Sobia Mustafa, Salina Persand

PERFORM UK Clinical Network: Clinical recruitment at Brighton and Sussex University Hospitals5

Katy Fidler (principal investigator), Julia Dudley (Clinical Research Registrar), Vivien Richmond (research nurse), Emma Tavliavini (research nurse)

Author Affiliations:

1. Section of Paediatric Infectious Disease, Wright-Fleming Institute, Norfolk Place, London W2 1PG, UK
2. Department of Materials, Royal School of Mines, Prince Consort Rd, London SW7 2AZ, UK
3. Children’s Clinical Research Unit, St Mary’s Hospital, Praed Street, London W2 1NY, UK
4. Paediatric Emergency Dept, St Mary’s Hospital, Praed Street, London W2 1NY, UK
5. Royal Alexandra Children’s Hospital, Brighton, BN2 5BE, UK.

**PARTNER: SERGAS, Santiago de Compostela, Spain**

Principal Investigators

Federico Martinón-Torres1, Antonio Salas1,2

GENVIP RESEARCH GROUP (in alphabetical order)

Fernando Álvez González1, Cristina Balo Farto1, Ruth Barral-Arca1,2, María Barreiro Castro1, Xabier Bello1,2, Mirian Ben García1, Sandra Carnota1, Miriam Cebey-López1, María José Curras-Tuala1,2, Carlos Durán Suárez1, Luisa García Vicente1, Alberto Gómez-Carballa1,2, Jose Gómez Rial1, Pilar Leboráns Iglesias1, Federico Martinón-Torres1, Nazareth Martinón-Torres1, José María Martinón Sánchez1, Belén Mosquera Pérez1, Jacobo Pardo-Seco1,2, Lidia Piñeiro Rodríguez1, Sara Pischedda1,2, Sara Rey Vázquez1, Irene Rivero Calle1, Carmen Rodríguez-Tenreiro1, Lorenzo Redondo-Collazo1, Miguel Sadiki Ora1, Antonio Salas1,2, Sonia Serén Fernández1, Cristina Serén Trasorras1, Marisol Vilas Iglesias1

Author Affiliations:

1. Translational Pediatrics and Infectious Diseases, Pediatrics Department, Hospital Clínico Universitario de Santiago, Santiago de Compostela, Spain, and GENVIP Research Group (www.genvip.org), Instituto de Investigación Sanitaria de Santiago, Universidad de Santiago de Compostela, Galicia, Spain.
2. Unidade de Xenética, Departamento de Anatomía Patolóxica e Ciencias Forenses, Instituto de Ciencias Forenses, Facultade de Medicina, Universidade de Santiago de Compostela, and GenPop Research Group, Instituto de Investigaciones Sanitarias (IDIS), Hospital Clínico Universitario de Santiago, Galicia, Spain
3. Fundación Pública Galega de Medicina Xenómica, Servizo Galego de Saúde (SERGAS), Instituto de Investigaciones Sanitarias (IDIS), and Grupo de Medicina Xenómica, Centro de Investigación Biomédica en Red de Enfermedades Raras (CIBERER), Universidade de Santiago de Compostela (USC), Santiago de Compostela, Spain

**PARTNER: Riga Stradins university, Riga, Latvia**

Principal Investigator

Dace Zavadska1,2

Other RSU group authors (in alphabetical order)

Anda Balode1,2, Arta Bārzdiņa1,2, Dārta Deksne1,2, Dace Gardovska1,2, Dagne Grāvele2, Ilze Grope1,2, Anija Meiere1,2, Ieva Nokalna1,2, Jana Pavāre1,2, Zanda Pučuka1,2, Katrīna Selecka1,2, Aleksandra Sidorova1,2, Dace Svile2, Urzula Nora Urbāne1,2.

Author Affiliations:

1. Riga Stradins university, Riga, Latvia.
2. Children clinical university hospital, Riga, Latvia.

**PARTNER: Medical Research Council Unit The Gambia (MRCG) at LSHTM Partner**

Principal Investigator

Effua Usuf

Additional Investigators

Kalifa Bojang, Syed M. A. Zaman, Fatou Secka, Suzanne Anderson, Anna Rocalsatou Sarr, Momodou Saidykhan, Saffiatou Darboe, Samba Ceesay, Umberto D’alessandro

Author Affiliations:

Medical Research Council Unit The Gambia at LSHTM.

P O Box 273, Fajara, The Gambia

**PARTNER: Erasmus MC - Sophia Children’s Hospital, Rotterdam, The Netherlands**

Principal Investigator

Henriëtte A. Moll¹

Research group

Dorine M. Borensztajn¹, Nienke N. Hagedoorn¹, Chantal Tan¹, Clementien L. Vermont², Joany Zachariasse¹

Additional investigator

Wim A Dik3

Author Affiliations:

1. Erasmus MC-Sophia Children’s Hospital, Department of General Paediatrics, Rotterdam, the Netherlands
2. Erasmus MC-Sophia Children’s Hospital, Department of Paediatric Infectious Diseases & Immunology, Rotterdam, the Netherlands
3. Erasmus MC, Department of immunology, Rotterdam, the Netherlands

**PARTNER: Swiss Pediatric Sepsis Study**

Principal Investigators

Philipp Agyeman1, Luregn J Schlapbach1,2,3,Eric Giannoni4,5, Martin Stocker6, Klara M Posfay-Barbe7, Ulrich Heininger8, Sara Bernhard-Stirnemann9, Anita Niederer-Loher10, Christian Kahlert10, Giancarlo Natalucci11, Christa Relly12, Thomas Riedel13, Christoph Aebi1, Christoph Berger12 *for the Swiss Pediatric Sepsis Study*

Author Affiliations:

1. Department of Pediatrics, Inselspital, Bern University Hospital, University of Bern, Switzerland
2. Paediatric Critical Care Research Group, Mater Research Institute, University of Queensland, Brisbane, Australia
3. Paediatric Intensive Care Unit, Lady Cilento Children’s Hospital, Children’s Health Queensland, Brisbane, Australia
4. Clinic of Neonatology, Department Mother-Woman-Child, Lausanne University Hospital and University of Lausanne, Switzerland
5. Infectious Diseases Service, Lausanne University Hospital, Lausanne, Switzerland
6. Department of Pediatrics, Children’s Hospital Lucerne, Lucerne, Switzerland
7. Pediatric Infectious Diseases Unit, Children’s Hospital of Geneva, University Hospitals of Geneva, Geneva, Switzerland
8. Infectious Diseases and Vaccinology, University of Basel Children’s Hospital, Basel, Switzerland
9. Children’s Hospital Aarau, Aarau, Switzerland
10. Division of Infectious Diseases and Hospital Epidemiology, Children’s Hospital of Eastern Switzerland St. Gallen, St. Gallen, Switzerland
11. Department of Neonatology, University Hospital Zurich, Zurich, Switzerland
12. Division of Infectious Diseases and Hospital Epidemiology, and Children’s Research Center, University Children’s Hospital Zurich, Switzerland
13. Children’s Hospital Chur, Chur, Switzerland

**PARTNER: University of Liverpool, UK**

Principal Investigators

Enitan D Carrol1,2,3, Stéphane Paulus1

Research Group (in alphabetical order)

Elizabeth Cocklin1, Rebecca Jennings4, Joanne Johnston4, Simon Leigh1, Karen Newall4, Sam T Romaine1

Author Affiliations:

1. Department of Clinical Infection, Microbiology and Immunology, University of Liverpool Institute of Infection and Global Health , Liverpool, England
2. Alder Hey Children’s Hospital, Department of Infectious Diseases, Eaton Road, Liverpool, L12 2AP
3. Liverpool Health Partners, 1st Floor, Liverpool Science Park, 131 Mount Pleasant, Liverpool, L3 5TF
4. Alder Hey Children’s Hospital, Clinical Research Business Unit, Eaton Road, Liverpool, L12 2AP

**PARTNER: National and Kapodistrian University of Athens (NKUA), Greece**

Principal investigator

Maria Tsolia(all activities)

Investigator/Research fellow

Irini Eleftheriou(all activities)

Additional investigators

Maria Tambouratzi (recruitment), Antonis Marmarinos (Lab, Quality Manager), Marietta Xagorari (Lab), Kelly Syggelou

Author Affiliations:

2nd Department of Pediatrics, National and Kapodistrian University of Athens,

“P. and A. Kyriakou” Children’s Hospital

Thivon and Levadias

Goudi, Athens

**PARTNER : Micropathology Ltd, Warwick, UK**

Colin Fink, Marie Voice, Leo Calvo-Bado

**PARTNER : Medical University of Graz (MUG), Austria**

Principal Investigator

Werner Zenz1 (all activities)

Co-investigators (in alphabetical order)

Benno Kohlmaier1 (all activities), Nina A. Schweintzger1 (all activities), Manfred G. Sagmeister1 (study design, consortium wide sample management)

Research team

Daniela S. Kohlfürst1 (study design), Christoph Zurl1 (BIVA PIC), Alexander Binder1 (grant application)

Recruitment team, data managers, (in alphabetical order)

Susanne Hösele1, Manuel Leitner1, Lena Pölz1, Glorija Rajic1

Clinical recruitment partners (in alphabetical order)

Sebastian Bauchinger1, Hinrich Baumgart6, Martin Benesch3, Astrid Ceolotto1, Ernst Eber2, Siegfried Gallistl1, Gunther Gores5, Harald Haidl1, Almuthe Hauer1, Christa Hude1, Markus Keldorfer5, Larissa Krenn4, Heidemarie Pilch5, Andreas Pfleger2, Klaus Pfurtscheller4, Gudrun Nordberg5, Tobias Niedrist8, Siegfried Rödl4, Andrea Skrabl-Baumgartner1, Matthias Sperl7, Laura Stampfer5, Volker Strenger3, Holger Till6, Andreas Trobisch5, Sabine Löffler5

Author Affiliations:

1. Medical University of Graz, Department of General Paediatrics, Austria
2. Medical University of Graz, Department of Paediatric Pulmonology, Austria
3. Medical University of Graz, Department of Paediatric Hemato-oncoloy, Austria
4. Medical University of Graz, Paediatric Intensive Care Unit, Austria
5. Medical University Graz, University Clinic of Paediatrics and Adolescent Medicine, Austria
6. Medical University of Graz, Department of Paediatric and Adolescent Surgery, Austria
7. Medical University Graz, Department of Pediatric Orthopedics, Austria
8. Medical University Graz, Clinical Institute of Medical and Chemical Laboratory Diagnostics, Austria

**PARTNER: London School of Hygiene and Tropical Medicine, UK**

Principal Investigator

Shunmay Yeung1,2 3

Research Group

Martin Hibberd1, Juan Emmanuel Dewez1, David Bath2, Alec Miners2, Ruud Nijman3, Catherine Wedderburn1, Anne Meierford1, Baptiste Leurent4

Author Affiliations:

1. Faculty of Infectious and Tropical Disease, London School of Hygiene and Tropical Medicine, London, UK
2. Faculty of Public Health and Policy, London School of Hygiene and Tropical Medicine, London, UK
3. Department of Paediatrics, St. Mary’s Hospital Imperial College Hospital, London, UK
4. Faculty of Epidemiology and Population Health, London School of Hygiene and Tropical Medicine, London, UK

**PARTNER : Radboud University Medical Center (RUMC),** **Nijmegen,** **The Netherlands**

Principal Investigators:

Ronald de Groot1, Michiel van der Flier1,2,3, Marien I. de Jonge1

Co-investigators Radboud University Medical Center (in alphabetical order)

Koen van Aerde1,2, Wynand Alkema1, Bryan van den Broek1, Jolein Gloerich1, Alain J. van Gool1, Stefanie Henriet1,2, Martijn Huijnen1, Ria Philipsen1, Esther Willems1

Investigators PeDBIG PERFORM DUTCH CLINICAL NETWORK (in alphabetical order)

G.P.J.M. Gerrits8, M. van Leur8, J. Heidema 4, L. de Haan1,2, C.J. Miedema 5, C. Neeleman 1, C.C. Obihara 6, G.A. Tramper-Stranders7

Author Affiliations:

1. Radboud University Medical Center, Nijmegen, The Netherlands
2. Amalia Children’s Hospital, Nijmegen, The Netherlands
3. Wilhelmina Children’s Hospital, University Medical Center Utrecht, Utrecht, The Netherlands
4. St. Antonius Hospital, Nieuwegein, The Netherlands
5. Catharina Hospital, Eindhoven, The Netherlands
6. ETZ Elisabeth, Tilburg, The Netherlands
7. Franciscus Gasthuis, Rotterdam, The Netherlands
8. Canisius Wilhelmina Hospital, Nijmegen, The Netherlands

**PARTNER : University of Oxford, UK**

Principal Investigators

Andrew J. Pollard1,2, Rama Kandasamy1,2, Stéphane Paulus 1,2

Additional Investigators

Michael J. Carter1,2, Daniel O'Connor1,2, Sagida Bibi1,2, Dominic F. Kelly1,2, Meeru Gurung3, Stephen Thorson3, Imran Ansari3, David R. Murdoch4, Shrijana Shrestha3.

Author Affiliations:

1. Oxford Vaccine Group, Department of Paediatrics, University of Oxford, Oxford, United Kingdom.
2. NIHR Oxford Biomedical Research Centre, Oxford, United Kingdom.
3. Paediatric Research Unit, Patan Academy of Health Sciences, Kathmandu, Nepal.
4. Department of Pathology, University of Otago, Christchurch, New Zealand.

**PARTNER: Newcastle University, Newcastle upon Tyne, UK**

Principal Investigator

Marieke Emonts 1,2,3 (all activities)

Co-investigators

Emma Lim2,3,7 (all activities), Lucille Valentine4

Recruitment team (alphabetical), data-managers, and GNCH Research unit

Karen Allen5, Kathryn Bell5, Adora Chan5, Stephen Crulley5, Kirsty Devine5, Daniel Fabian5, Sharon King5, Paul McAlinden5, Sam McDonald5, Anne McDonnell2,5, Ailsa Pickering2,5, Evelyn Thomson5, Amanda Wood5, Diane Wallia5, Phil Woodsford5,

Sample processing: Frances Baxter5, Ashley Bell5, Mathew Rhodes5

PICU recruitment

Rachel Agbeko8, Christine Mackerness8

Students MOFICHE

Bryan Baas2, Lieke Kloosterhuis2, Wilma Oosthoek2

Students/medical staff PERFORM

Tasnim Arif6, Joshua Bennet2, Kalvin Collings2, Ilona van der Giessen2, Alex Martin2, Aqeela Rashid6, Emily Rowlands2, Gabriella de Vries2, Fabian van der Velden2

Engagement work/ethics/cost effectiveness

Mike Martin9, Ravi Mistry2, Lucille Valentine4

Author Affiliations:

1. Translational and Clinical Research Institute, Newcastle University, Newcastle upon Tyne UK
2. Great North Children’s Hospital, Paediatric Immunology, Infectious Diseases & Allergy, Newcastle upon Tyne Hospitals NHS Foundation Trust, Newcastle upon Tyne, United Kingdom.
3. NIHR Newcastle Biomedical Research Centre based at Newcastle upon Tyne Hospitals NHS Trust and Newcastle University, Westgate Rd, Newcastle upon Tyne NE4 5PL, United Kingdom
4. Newcastle University Business School, Centre for Knowledge, Innovation, Technology and Enterprise (KITE), Newcastle upon Tyne, United Kingdom
5. Great North Children’s Hospital, Research Unit, Newcastle upon Tyne Hospitals NHS Foundation Trust, Newcastle upon Tyne, United Kingdom.
6. Great North Children’s Hospital, Paediatric Oncology, Newcastle upon Tyne Hospitals NHS Foundation Trust, Newcastle upon Tyne, United Kingdom.
7. Population Health Sciences Institute, Newcastle University, Newcastle upon Tyne, UK
8. Great North Children’s Hospital, Paediatric Intensive Care Unit, Newcastle upon Tyne Hospitals NHS Foundation Trust, Newcastle upon Tyne, United Kingdom.
9. Northumbria University, Newcastle upon Tyne, United Kingdom

**PARTNER : University Medical Centre Ljubljana, Slovenia**

Principal Investigator

Marko Pokorn1,2,3 MD, PhD

Research Group

Mojca Kolnik1 MD, Katarina Vincek1 MD, Tina Plankar Srovin1 MD, PhD, Natalija Bahovec1 MD, Petra Prunk1 MD, Veronika Osterman1 MD, Tanja Avramoska1 MD

Author Affiliations:

1. Department of Infectious Diseases, University Medical Centre Ljubljana, Japljeva 2, SI-1525 Ljubljana, Slovenia
2. University Childrens' Hospital, University Medical Centre Ljubljana, Ljubljana, Slovenia
3. Department of Infectious Diseases and Epidemiology, Faculty of Medicine, University of Ljubljana, Slovenia

**PARTNER : Academic Medical Hospital & Sanquin Research Institute, Amsterdam, NL**

Principal Investigator

Taco Kuijpers 1,2

Co-investigators

Ilse Jongerius 2

Recruitment team (EUCLIDS, PERFORM)

J.M. van den Berg1, D. Schonenberg1, A.M. Barendregt1, D. Pajkrt1, M. van der Kuip1,3, A.M. van Furth1,3

Students PERFORM

Evelien Sprenkeler 2, Judith Zandstra 2

Technical support PERFORM

G. van Mierlo 2, J. Geissler 2

Author Affiliations:

1. Amsterdam University Medical Center (Amsterdam UMC), location Academic Medical Center (AMC), Dept of Pediatric Immunology, Rheumatology and Infectious Diseases, University of Amsterdam, Amsterdam, the Netherlands
2. Sanquin Research Institute, & Landsteiner Laboratory at the AMC, University of Amsterdam, Amsterdam, the Netherlands.
3. Amsterdam University Medical Center (Amsterdam UMC), location Vrije Universiteit Medical Center (VUMC), Dept of Pediatric Infectious Diseases and Immunology, Free University (VU), Amsterdam, the Netherlands (former affiliation)

**PARTNER: National Cheng Kung University Hospital, Taiwan**

Ching-Fen Shen (Principal Investigator); Ching-Chuan Liu (Co-investigator); Shih-Min Wang (Co-investigator), funded by the Center of Clinical Medicine Research, National Cheng Kung University

**PARTNER: Ludwig Maximilians University Munich, Germany**

Principal Investigator:

Ulrich von Both1,2

Research group:

Laura Kolberg¹, Manuela Zwerenz¹, Judith Buschbeck¹

Clinical recruitment partners (in alphabetical order):

Christoph Bidlingmaier3, Vera Binder4, Katharina Danhauser5, Nikolaus Haas10, Matthias Griese6, Tobias Feuchtinger4, Julia Keil9, Matthias Kappler6, Eberhard Lurz7, Georg Muench8, Karl Reiter9, Carola Schoen9

Author Affiliations:

1. Div. Paediatric Infectious Diseases, Hauner Children’s Hospital, University Hospital, Ludwig Maximilians University (LMU), Munich, Germany
2. German Center for Infection Research (DZIF), Partner Site Munich, Munich, Germany
3. Div. of General Paediatrics, Hauner Children’s Hospital, University Hospital, Ludwig Maximilians University (LMU), Munich, Germany
4. Div. Paediatric Haematology & Oncology, Hauner Children’s Hospital, University Hospital, Ludwig Maximilians University (LMU), Munich, Germany
5. Div. of Paediatric Rheumatology, Hauner Children’s Hospital, University Hospital, Ludwig Maximilians University (LMU), Munich, Germany
6. Div. of Paediatric Pulmonology, Hauner Children’s Hospital, University Hospital, Ludwig Maximilians University (LMU), Munich, Germany
7. Div. of Paediatric Gastroenterology, Hauner Children’s Hospital, University Hospital, Ludwig Maximilians University (LMU), Munich, Germany
8. Neonatal Intensive Care Unit, Hauner Children’s Hospital, University Hospital, Ludwig Maximilians University (LMU), Munich, Germany
9. Paediatric Intensive Care Unit Hauner Children’s Hospital, University Hospital, Ludwig Maximilians University (LMU), Munich, Germany
10. Department Pediatric Cardiology and Pediatric Intensive Care, University Hospital, Ludwig Maximilians University (LMU), Munich, Germany

**PARTNER: bioMérieux, France**

Principal Investigator:

François Mallet1,2, 3

Research Group:

Karen Brengel-Pesce1,2,3, Alexandre Pachot1, Marine Mommert1,2

1. Open Innovation & Partnerships (OIP), bioMérieux S.A., Marcy l'Etoile, France
2. Joint research unit Hospice Civils de Lyon - bioMérieux, Centre Hospitalier Lyon Sud, 165 Chemin du Grand Revoyet, 69310 Pierre-Bénite, France
3. EA 7426 Pathophysiology of Injury-induced Immunosuppression, University of Lyon1-Hospices Civils de Lyon-bioMérieux, Hôpital Edouard Herriot, 5 Place d’Arsonval, 69437 Lyon Cedex 3, France
